# Supplementary material for: The insulin and IGF signaling pathway sustains breast cancer stem cells by IRS2/PI3K-mediated regulation of MYC
Source: PubMed Central journal article supplement — Cell Rep. Author manuscript; Available in PMC 2022 Dec 27. (PMC9793643; doi:10.1016/j.celrep.2022.111759), 2022-12-06
Supplement: NIHMS1855849-supplement-1.pdf [file NIHMS1855849-supplement-1.pdf]

**Cell Reports, Volume 41**

**Supplemental information**

**The insulin and IGF signaling pathway**

**sustains breast cancer stem cells**

**by IRS2/PI3K-mediated regulation of MYC**

**Ji-Sun Lee, Michael W. Lero, Jose Mercado-Matos, Sha Zhu, Minjeong Jo, Claire E. Tocheny, Jennifer S. Morgan, and Leslie M. Shaw**

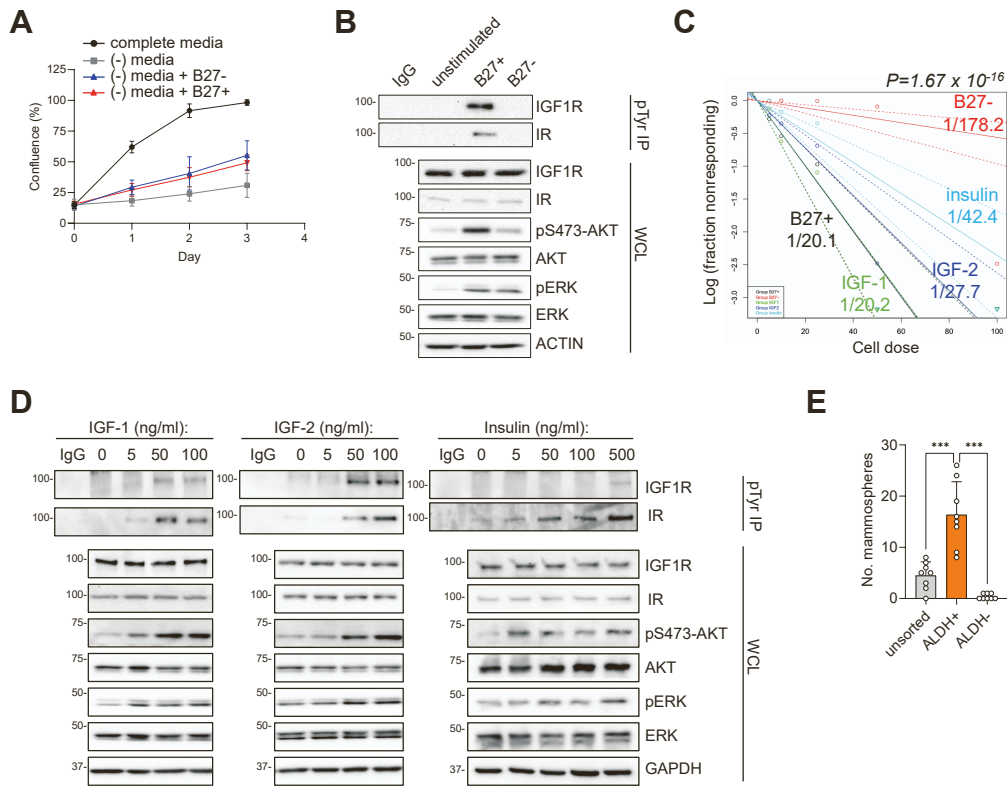

Figure S1. Analysis of signaling in response to IGF-1, IGF-2, and insulin, Related to Figure 1

**A**

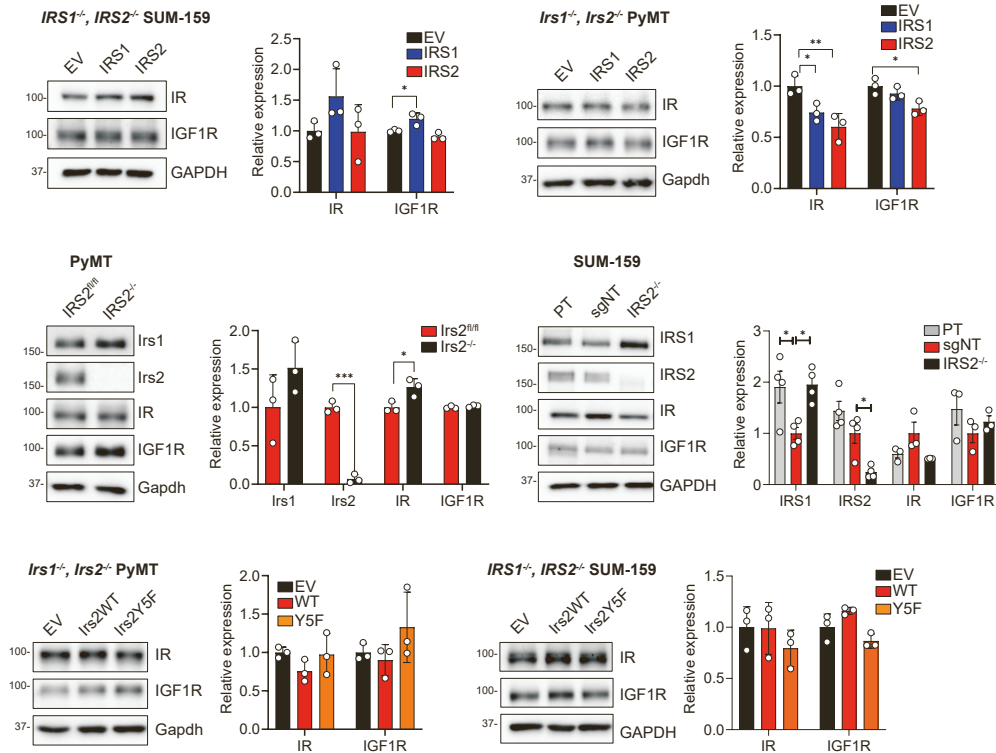

**B**

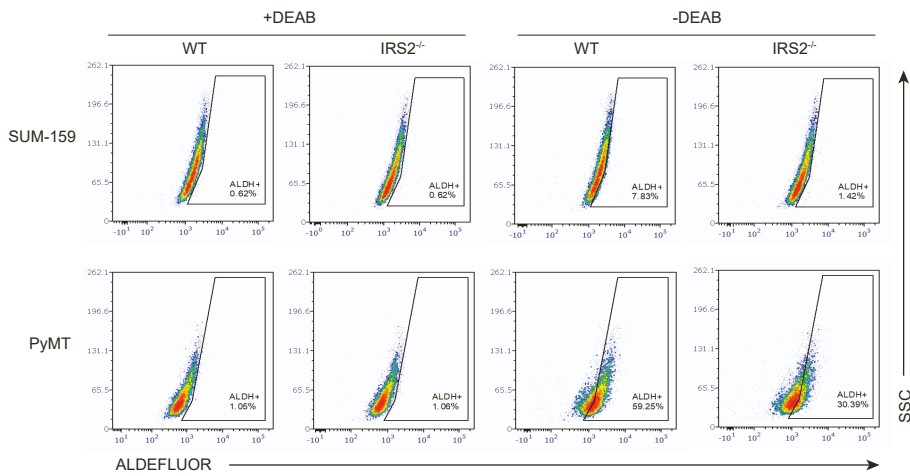

Figure S2. IRS2 regulates breast cancer stemness. Related to Figure 2

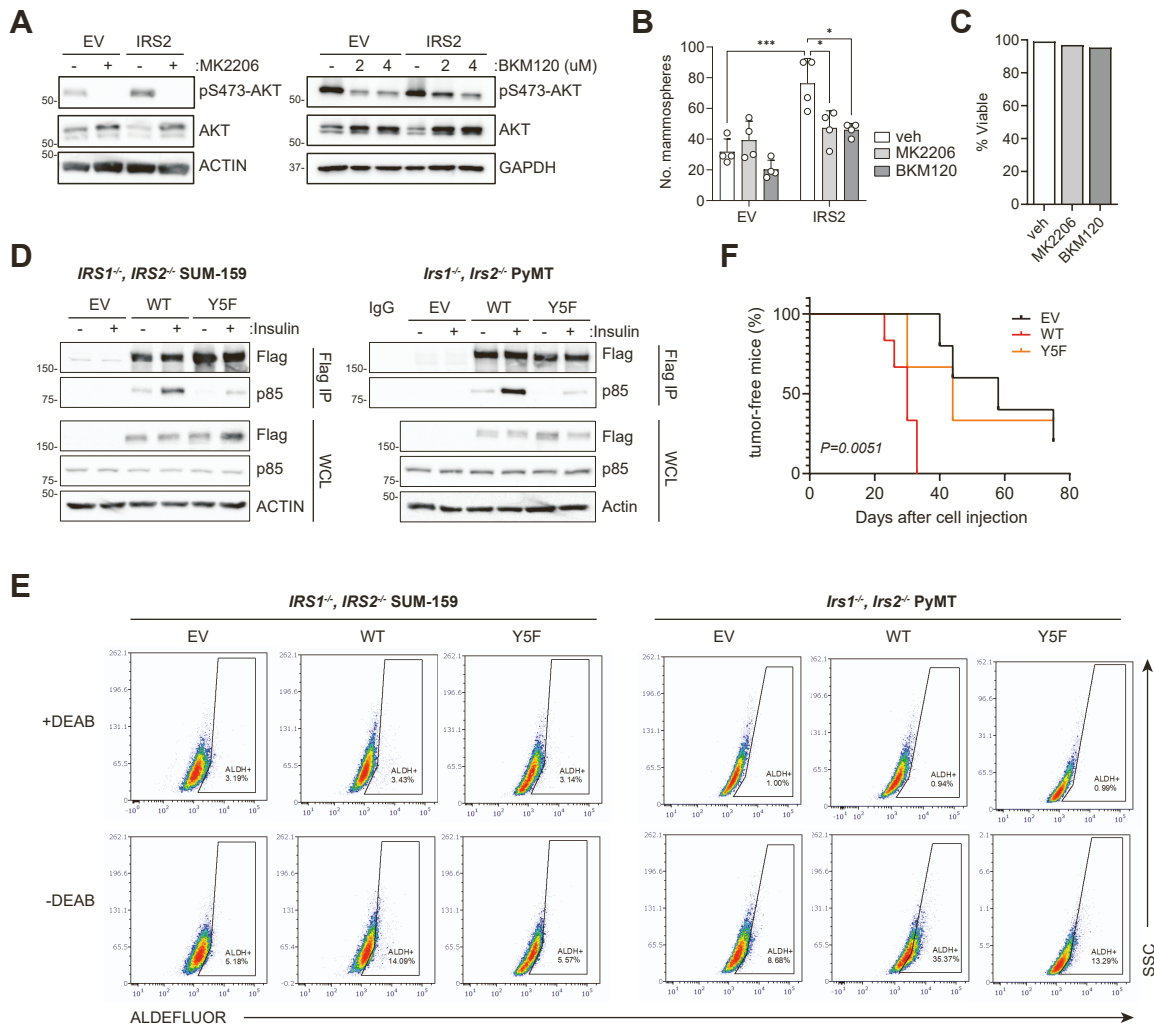

Figure S3. IRS2 activation of PI3K is required for self-renewal of breast CSCs. Related to Figure 2

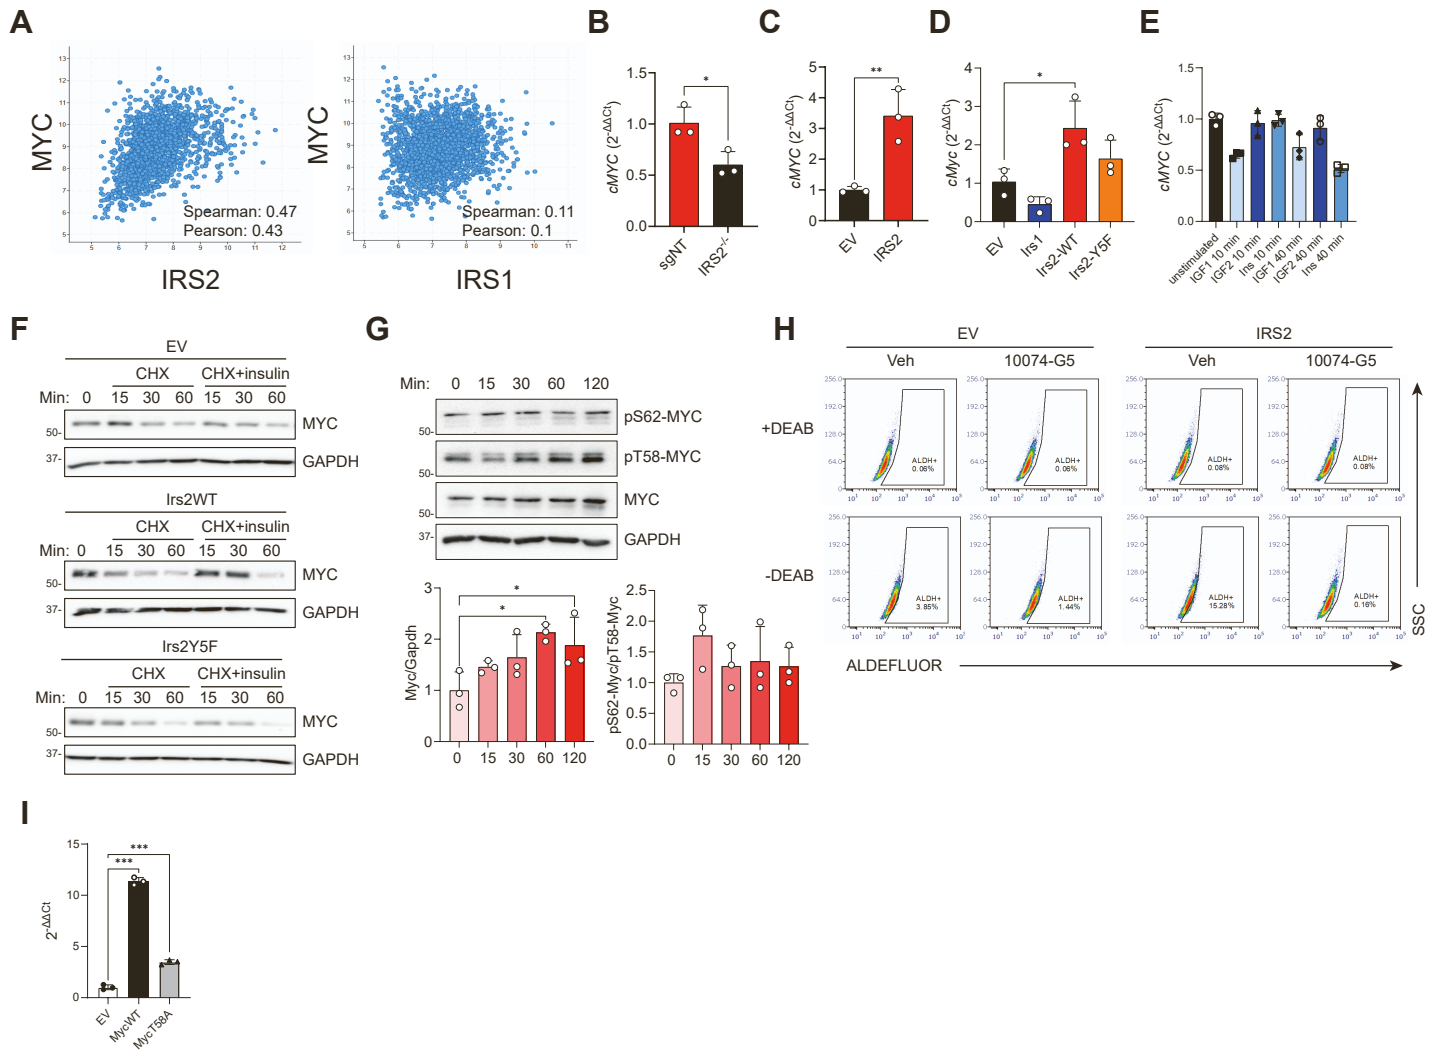

Figure S4. IRS2 regulates self-renewal through MYC. Related to Figures 3 and 4

**Figure S1. Analysis of signaling in response to IGF-1, IGF-2, and insulin. Related to Figure**

**1** (A) SUM-159 cells were plated in 96-well plates with complete growth medium. Medium was replaced with the indicated media (Day 0) and growth rate was monitored by measuring cell confluency using a Celigo imaging cytometer. The data shown represent the mean  $\pm$  S.D. of a representative experiment performed three times independently. (B) SUM-159 cells were stimulated with B27 supplement containing insulin (B27+) or without insulin (B27-) for 15 minutes, followed by immunoprecipitation and immunoblotting. (C) *In vitro* limiting dilution assays with *Irs2*<sup>-/-</sup> PyMT cells expressing *mlrs2*-WT were performed in B27+, B27- or B27- medium supplemented with individual ligands (50 ng/ml). Data are presented as a log-log plot, and the frequency of stem cells is calculated by extreme limiting dilution analysis. (D) SUM-159 cells were stimulated with IGF-1, IGF-2 or insulin in a dose-dependent manner for 10 minutes, followed by immunoprecipitation and immunoblotting. (E) ALDH<sup>+</sup> or ALDH<sup>-</sup> SUM-159 cells were sorted by flow cytometry and plated into low attachment plates to analyze mammosphere formation. The data shown are a representative assay. WCL, whole cell lysate. \*\*\*P<0.001.

**Figure S2. IRS2 regulates breast cancer stemness. Related to Figure 2**

(A) Expression of IR and IGF1R in cell lines used in this study. (B) Representative density plots of ALDEFLUOR assays of SUM-159 and PyMT cells (related to Figure 2F and 2G).

**Figure S3. IRS2 activation of PI3K is required for self-renewal of breast CSCs. Related to**

**Figure 2** (A) *IRS1*<sup>-/-</sup>, *IRS2*<sup>-/-</sup> SUM-159 cells expressing EV or IRS2 were treated with MK2206 (1  $\mu$ M) or BKM120 for 24 hours followed by immunoblotting. (B) *IRS1*<sup>-/-</sup>, *IRS2*<sup>-/-</sup> SUM-159 cells expressing EV or IRS2 were treated with MK2206 (1  $\mu$ M) or BKM120 (4  $\mu$ M) for 24 hours. Cells were trypsinized and viable cells (C) were assayed for mammospheres. (D) *IRS1*<sup>-/-</sup>, *IRS2*<sup>-/-</sup> SUM-159 cells and *Irs1*<sup>-/-</sup>, *Irs2*<sup>-/-</sup> PyMT cells expressing EV, *Irs2*-WT (WT), or *Irs2*-Y5F (Y5F) were stimulated with insulin (100 ng/ml, 10 minutes), followed by immunoprecipitation and immunoblotting. (E) Representative density plots of ALDEFLUOR assays of *IRS1*<sup>-/-</sup>, *IRS2*<sup>-/-</sup> SUM-

159 cells and *Irs1*<sup>-/-</sup>, *Irs2*<sup>-/-</sup> PyMT cells expressing EV, Irs2-WT, or Irs2-Y5F (related to Figure 2K and 2L). (F) Percentage of tumor free mice injected with 10<sup>5</sup> *Irs1*<sup>-/-</sup>, *Irs2*<sup>-/-</sup> PyMT cells expressing EV, Irs2-WT, or Irs2-Y5F cells. WCL, whole cell lysate. \*p<0.05; \*\*p<0.01.

**Figure S4. IRS2 regulates self-renewal through MYC. Related to Figures 3 and 4** (A) Correlation between mRNA expression of *IRS2* and *IRS1* with *MYC* in cBioPortal. (B-E) Fold change of MYC mRNA expression in (B) *IRS2*<sup>+/+</sup> (sgNT) or *IRS2*<sup>-/-</sup> SUM159 cells; (C) *IRS2*<sup>-/-</sup> SUM-159 cells expressing EV or IRS2; (D) *Irs1*<sup>-/-</sup>, *Irs2*<sup>-/-</sup> PyMT cells (EV) with restored expression of mlrs1, mlrs2 or mlrs2-Y5F; (E) *IRS1*<sup>-/-</sup>, *IRS2*<sup>-/-</sup> SUM-159 cells expressing IRS2 were serum starved and stimulated with insulin, IGF-1 or IGF-2 (50 ng/ml) for 10 or 40 minutes. (F) *IRS1*<sup>-/-</sup>, *IRS2*<sup>-/-</sup> SUM-159 cells with restored Irs2-WT or Irs2-Y5F were treated with cycloheximide in the absence or presence of insulin for the indicated times. (G) *Irs1*<sup>-/-</sup>, *Irs2*<sup>-/-</sup> PyMT cells expressing Irs1 were stimulated with IGF1 (50 ng/ml) for the time periods indicated. (H) Representative density plots of ALDEFLUOR assays of *IRS1*<sup>-/-</sup>, *IRS2*<sup>-/-</sup> SUM-159 cells expressing EV or IRS2 after treatment with 10074-G5 (related to Figure 4A). (I) Fold change of exogenous *Myc* mRNA expression in *IRS2*<sup>-/-</sup> PyMT cells expressing EV, MycWT or MycT58A. The data shown represent the mean ± S.D. of three independent experiments. \*p<0.05; \*\*p<0.01; \*\*\*p<0.001.
